# Supplementary material for: Ion cooperativity and the effect of salts on polypeptide structure – a molecular dynamics study of BBA5 in salt solutions
Source: Royal Society of Chemistry journal article supplement (doi:10.1039/c2fd20065a), 2012-05-15
Supplement: c2fd20065a.pdf [file c2fd20065a.pdf]

### Simulation details about BBA5 in NaF solution

We also performed simulations of BBA5 in NaF solutions. The molar ratio of electrolyte/water in NaF solutions is exactly the same as that in NaI solutions. The concentration of NaF is ~4.9 mol/L. Force field parameters of F<sup>-</sup> were also taken from Joung and Cheatham [1]. Comparison between the three salt systems is given in the supplementary information.

We used the same simulation procedure that described in the simulation details to simulate BBA5 in NaF solution.

### Results on the simulation of BBA5 in NaF solution.

#### 1. Hydrogen bond number

| Backbone<br>HB | In<br>NaI<br>solution | In<br>NaF<br>solution | In<br>Na <sub>2</sub> SO <sub>3</sub><br>solution | In<br>Water |
|----------------|-----------------------|-----------------------|---------------------------------------------------|-------------|
| F8O-Y1H        | 0.00                  | 0.00                  | 0.00                                              | 0.00        |
| Y1O-F8H        | <i>0.00</i>           | <i>0.00</i>           | <i>0.00</i>                                       | 0.68        |
| Y6O-V3H        | <i>0.00</i>           | 0.96                  | 0.96                                              | 0.96        |
| V3O-Y6H        | <i>0.00</i>           | <b>0.48</b>           | <b>0.75</b>                                       | 0.27        |
| R10O-L14H      | <b>0.27</b>           | 0.07                  | <b>0.89</b>                                       | 0.07        |
| S11O-A15H      | <i>0.00</i>           | <b>0.68</b>           | <b>0.62</b>                                       | 0.19        |
| D12O-K16       | 0.00                  | 0.00                  | 0.10                                              | 0.09        |
| E13O-L17H      | 0.00                  | 0.00                  | 0.00                                              | 0.07        |
| L14O-L18H      | 0.41                  | <b>0.84</b>           | <b>0.96</b>                                       | 0.35        |
| A15O-R19       | <b>0.40</b>           | <i>0.00</i>           | <b>0.38</b>                                       | 0.27        |
| K16O-Q20       | <i>0.00</i>           | <i>0.00</i>           | <i>0.00</i>                                       | 0.12        |
| L17O-H21H      | <b>0.45</b>           | <i>0.19</i>           | <i>0.00</i>                                       | 0.30        |
| L18O-A22H      | <i>0.19</i>           | <i>0.03</i>           | 0.28                                              | 0.36        |
| R19O-G23       | 0.00                  | 0.00                  | 0.00                                              | 0.00        |

Table 1. The average number of backbone hydrogen bonds of BBA5 formed in NaI solution, NaF solution, Na<sub>2</sub>SO<sub>3</sub> solution, and pure water, respectively. The average is over the last 50 ns of the simulations. Overall, hydrogen bonds are strengthened (**bold**) in the Na<sub>2</sub>SO<sub>3</sub> solution and weakened (*italic*) in the NaI solution, compared to those in pure water. The strengthening of hydrogen bond in the Na<sub>2</sub>SO<sub>3</sub> solution is seen where strong hydrophobic contacts are formed between the alpha and the beta domains (residues 3,6 and 10-15).

**2. Comparison between of polar and apolar SASA distribution functions for the three salt systems (black Na<sub>2</sub>SO<sub>3</sub>, red, NaI, and blue, NaF).**

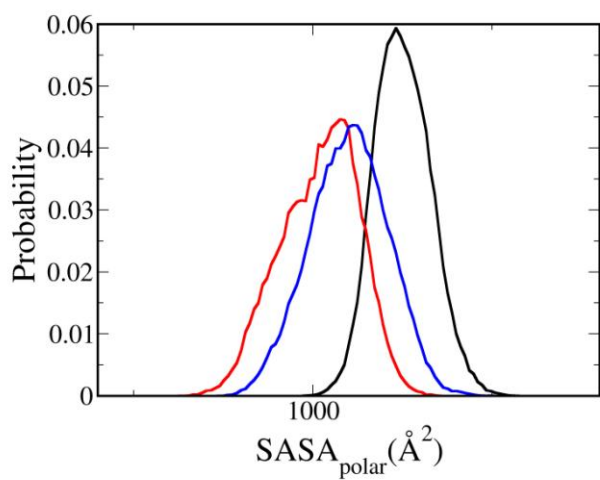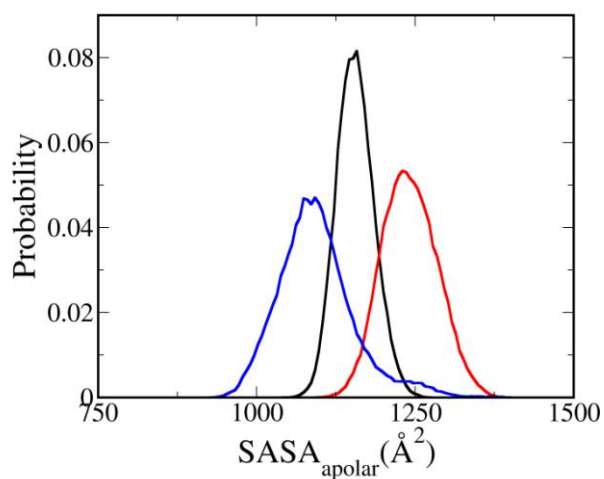

**3. The RDF of Na<sup>+</sup> around the carbonyl oxygen averaged for all residues in NaF (blue) and NaI (red) solutions.**

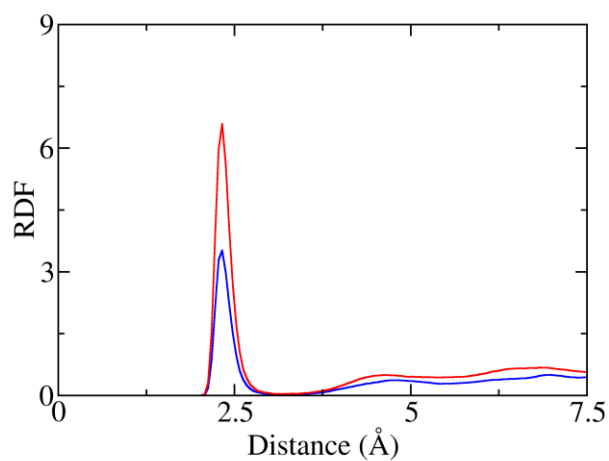

**4. The RDF of F<sup>-</sup> (blue) and I<sup>-</sup> (red) around the polypeptide backbone NH groups.**

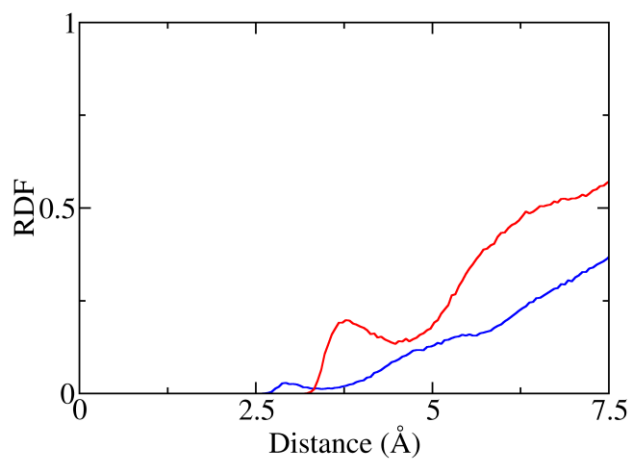

**5. The number of Na<sup>+</sup> (line) and water molecules (dash dot) around the BBA5 backbone carbonyl oxygen as a function of center-to-center distances in NaF solution**

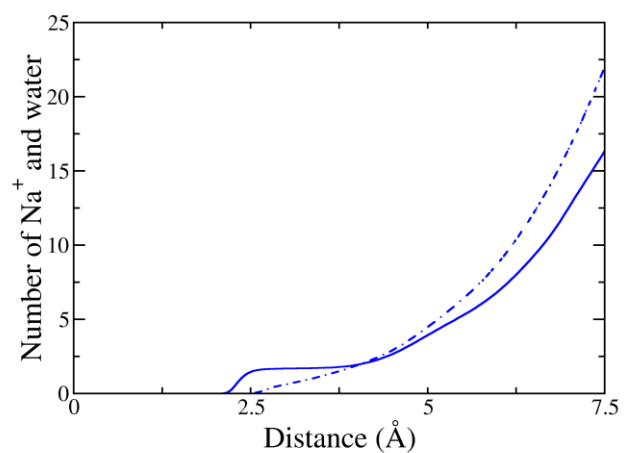

**6. The averaged number of  $F^-$  (blue) and  $I^-$  (red) around  $Na^+$  as a function of center-to-center distances between the ions.**

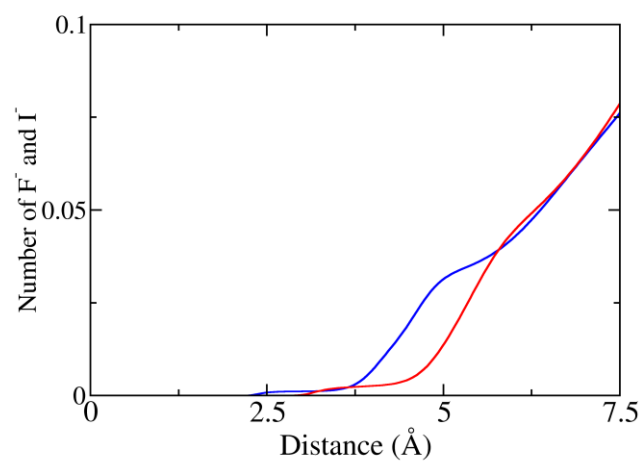

**Reference**

1. In Suk Joung; T. E. Cheatham III. *J. Phys. Chem. B*, 2008, 112, 9020.
